# Supplementary material for: Heterogeneous rarity patterns drive price dynamics in NFT collections
Source: Springer Nature journal article supplement (doi:10.1038/s41598-022-17922-5), 2022-08-16
Supplement: 41598_2022_17922_MOESM1_ESM.pdf [file 41598_2022_17922_MOESM1_ESM.pdf]

# Supplementary Information for "Heterogeneous rarity patterns drive price dynamics in NFT collections"

Amin Mekacher, Alberto Bracci, Matthieu Nadini, Mauro Martino,  
Laura Alessandretti, Luca Maria Aiello, Andrea Baronchelli

## Contents

|          |                                     |          |
|----------|-------------------------------------|----------|
| <b>A</b> | <b>OpenSea market mechanisms</b>    | <b>2</b> |
| <b>B</b> | <b>Generative art mechanisms</b>    | <b>2</b> |
| <b>C</b> | <b>List of collections</b>          | <b>3</b> |
| <b>D</b> | <b>Rarity score distributions</b>   | <b>4</b> |
| <b>E</b> | <b>Supplementary figures</b>        | <b>4</b> |
| E.1      | Rarity rank results . . . . .       | 7        |
| E.2      | Currency robustness check . . . . . | 9        |
| E.3      | Time robustness check . . . . .     | 10       |
| E.4      | Tails robustness check . . . . .    | 12       |

## A OpenSea market mechanisms

For a majority of NFT collectibles, the minting happens as follows. The creators offer the possibility for anyone with a wallet to generate a new NFT for a fixed price, whose attributes will be randomly selected, even though each attribute can only be given to a specific amount of NFTs. Once every NFT has been minted by the community, they are made available to their buyers, who can sell them on a marketplace afterwards.

Before releasing their collection, creators also set how much royalty they want to get from each secondary sale related to their NFTs. As such, every time a new sale happens, the royalty is deduced from the share the seller gets, as well at 2.5% of the total price that OpenSea gets from every sale taking place on their platform.

The following table details, for a few collections, the initial price at which the NFTs could be minted (gas fee, i.e., the fees required to conduct a transaction on the Ethereum blockchain, not included). Note that these transactions are not considered as sales per se by OpenSea’s official API.

| <b>Collection</b>     | <b>Minting Price</b>                                          |
|-----------------------|---------------------------------------------------------------|
| CryptoPunks           | Free                                                          |
| Bored Ape Yacht Club  | 0.08 ETH                                                      |
| World of Women        | 0.07 ETH                                                      |
| CryptoTrunks          | 0.5 ETH                                                       |
| CryptoCorgi           | First corgi to be claimed at 0.001 ETH, last one at 1.001 ETH |
| Sewer Rat Social Club | 0.05 ETH                                                      |
| Rabbit College Club   | 0.02 ETH                                                      |
| Cute Pig Club         | 0.03 ETH                                                      |
| Ape Gang              | Free                                                          |

## B Generative art mechanisms

As previously mentioned, NFT collectibles are usually generated using an algorithmic procedure, which can lead to thousands of unique tokens created with the same set of instructions [1]. However, the inner workings of the algorithms have not been shared by the creators, and can greatly differ between collections. It is therefore impossible to assess whether the rarity curves for the collections displayed in Section “Quantifying Rarity” share similarities because their algorithms follow similar steps. In the case of the CryptoPunks, members of the community have been attempting to reverse-engineer the algorithm used by Larva Labs to generate the original Punks [2], or even to replicate it [3, 4]. However, the creators never released any information on the matter, as well as any other NFT collectibles creator.

## C List of collections

| Collection Names               |                                    |                        |                                   |                                 |
|--------------------------------|------------------------------------|------------------------|-----------------------------------|---------------------------------|
| 0N1 Force                      | 0xVampire Project                  | 24px                   | 8 BIT UNIVERSE                    | Absurd Arboretum                |
| Adam Bomb Squad                | AfroDroids By Owo                  | AI Cabones             | AlphaBetty Doodles                | AmeegosOfficialNFT              |
| Angels of Aether               | Angry Boars                        | AnimalWorldWar         | Animathereum                      | Animetas                        |
| Ape Gang                       | Ape Harbour Yachts                 | ApesOfSpace            | Approving Corgis                  | Arabian Camels                  |
| ArcadeNFT                      | Art Stars Club Official            | Astro Frens            | Astrohedz                         | Avarik Saga Universe            |
| Avastars                       | Axolittles                         | BASTARD GAN PUNKS V2   | BLU Blox                          | BULLSEUM                        |
| BYOPills                       | Baby Combat Bots G1                | Bad Bunnies NFT        | Bad Kids Alley Official           | Badass Bulls                    |
| Barn Owls                      | Barn Owls Dino Palz                | Based Fish Mafia       | Bear Market Bears                 | Bears Deluxe                    |
| BearsOnTheBlock                | Beatnik Tiki Tribe                 | Bit Wine               | BlankFace                         | Blob Mob                        |
| BlockchainBikers               | Bones & Bananas                    | Bones Club Heritage    | Bonsai by ZENFT                   | Bored Ape Kennel Club           |
| Bored Ape Yacht Club           | Bored Mummy Baby Waking Up         | Bored Mummy Waking Up  | Boring Bananas Co.                | Boss Beauties                   |
| BroadcastersNFT                | BullsOnTheBlock                    | Bunker Beasts          | Buzzed Bear Hideout               | CHIBI DINOS                     |
| COVIDPunks!                    | CanineCartel                       | Cartlads               | Cactus Collectibles               | Catshit Crazy                   |
| Chads NFT                      | ChainFaces                         | Chibi Apes             | Chihuahua Gang                    | Chill Frogs NFT                 |
| Chiptos                        | Chubbies                           | Ciphersquares Official | Citizens of Bulliever Island      | Claylings                       |
| CleverGirls NFT                | Cool Cats NFT                      | Crazy Crows Chess Club | Crazy Dragon Corps                | Crazy Lizard Army               |
| CrazySkullzNFT                 | Criminal Donkeys                   | Crumbys Bakery         | CrypToadz by GREMLIN              | Cryptinieis                     |
| Crypto Cannabis Club           | Crypto Corgis                      | Crypto Duckies         | Crypto Ghosts NFT                 | Crypto Hobos                    |
| Crypto Hodlers NFT             | Crypto Squatches                   | Crypto Tuners          | Crypto.Chicks                     | CryptoFighters                  |
| CryptoFinney                   | CryptoMutts                        | CryptoPunks            | CryptoSkulls                      | CryptoTrunks                    |
| Cunning Foxes                  | Cupcats Official                   | Cute Pig Club          | CyberKongz                        | CyberKongz VX                   |
| CyberPunkA12                   | Cybergirl Fashion                  | Cypher City            | Dapper Dinosaurs Karma Collective | Dapper Dinosaurs NFT            |
| Dapper Space Collective        | Dead Devil Society                 | DeadFellaz             | DeadHeads                         | Deadbears Official              |
| Deez Nuts (Official Nuts)      | Degen Gang                         | Degenz                 | Delisted Tiny Punks               | Derpy Birbs                     |
| Devious Demon Dudes            | Dizzy Dragons                      | Doge Pound Puppies     | DogePirates                       | Dogs Unchained                  |
| Dope Shibas                    | Dreamloops                         | DystoPunks             | Encryptas                         | Epic Eagles                     |
| Ether Cards Founder            | EtherGals                          | Ethereans Official     | Etheremura                        | Evil Teddy Bear Club            |
| FLUF World                     | FUD Monsters                       | FVCK.CRYSTAL//         | FameLadySquas                     | Fang Gang                       |
| Garmers Marketverse Patrons    | Fast Food Frens Collection         | Fast Food Punks        | Fatales                           | Flowtys                         |
| Floyds World                   | Forgotten Runes Wizards Cult       | FoxyFam                | Frogs In Disguise                 | FusionApes                      |
| Fxck Face                      | GLICPIXXXVER002 - GRAND COLLECTION | GOATz                  | GRAYCRAFT2                        | GRILLZ GANG                     |
| Galactic Secret Agency         | GalacticApes                       | Galaxy Fight Club      | Galaxy-Eggs                       | GameOfBlocks                    |
| Gator World NFT                | Gauntlets                          | Genesis Block Art      | Glue Factory Show                 | Goblin Goons                    |
| Good Guys NFT                  | Goons of Balatroom                 | Gorilla Nemesis        | Great Ape Society                 | Guardians of the Metaverse      |
| Gutter Cat Gang                | Gutter Rats                        | HDPunks                | HODL GANG                         | Hammys                          |
| HappyLand Gummy Bears Official | HashGuise Gen One                  | Hashmasks              | HatchDracoNFT                     | Heroes of Evermore              |
| Hewer Clan                     | HodlHeads                          | Holy Cows              | HypeHippo.io                      | IMMORTALZ - Ambarly Assassins   |
| Incognito                      | Kamagang                           | Keplers Civil Society  | KidPunks                          | Knights of Degen - Knights!     |
| Koala Intelligence Agency      | Koin Games Dev Squad               | Kokeshi World          | Krazy Koalas NFT                  | Lamb Duhs                       |
| Lazy Lions                     | Lazy Lions Bungalows               | Lobby Lobsters         | Lockdown Lemmings                 | Lonely Planet Space Observatory |
| Long Neckie Fellas             | Long Neckie Ladies                 | Loopy Donuty           | Loot (for Adventurers)            | Lost Souls Sanctuary            |

| Collection Names         |                             |                                            |                               |                          |
|--------------------------|-----------------------------|--------------------------------------------|-------------------------------|--------------------------|
| Lostboy NFT              | Lucha Libre Knockout        | Lucky Maneki                               | Lucky Sloths NFT              | Lumps World              |
| Lysergic Labs Shroomz    | MOONDOGS ODYSSEY            | Mad Banana Union                           | Mad Cat Militia               | MaestroPups              |
| Magic Mushroom Clubhouse | Mandelbrot Set Collection   | Maneki Gang                                | MarsCatsVoyage                | Meebits                  |
| Mighty Manateez          | Mini Monkey Mafia           | Minimints                                  | MissCryptoClub                | MjiBots                  |
| Monas                    | MonkePunks                  | Monkeybrix                                 | Monster Blocks - Official     | Monster Rehab 1.0        |
| Mutant Ape Yacht Club    | MutantKongz                 | Muttinks                                   | My Fucking Pickle             | NFT Siblings             |
| NFTBOY: Bored Ape Racers | NOOBS NFT                   | Naughty Tigers Costume Club                | Neon Junkies                  | Nice Drips               |
| Nifty League DEGENs      | Niftyriots                  | Non-Fungible Heroes                        | Notorious Frogs               | ORCZ!                    |
| OctoHedz                 | Oddball Club (Official)     | Official DogeX                             | Ommimorphs                    | OnChainMonkey            |
| Osiris Cosmic Kids       | PEACEFUL GROUPIES           | PORK1984                                   | POW NFT                       | PPPandas                 |
| Paladin Pandas           | Panda Dynasty               | Panda Golf Squad                           | Party Penguins                | Penguin Fight Club       |
| PinapplesDayOut          | Pirate Treasure Booty Club  | PixaWizards                                | Platy Punks - Official        | PogPunks NFT             |
| Polar Pals Bobsledding   | Posh Pandas                 | Potato Power Club                          | Primate Social Society        | Procedural Space         |
| Pudgy Penguins           | PunkBabies                  | PunkCats                                   | PunkScapes                    | Purnelopes Country Club  |
| PyMons                   | Qubits On The Ice           | RUUMZ                                      | Rabbit College Club           | Raccoon Mafia            |
| Raccoons Club            | RagingRhinos                | Re-Genz                                    | Ready Player Cat NFT          | Reb3l Bots               |
| Reckless Whales          | RichKidsOfficial            | Rickstro Frens                             | Rivermen                      | Roaring Leaders          |
| Robotos Offocial         | Rogue Society Bots          | Royal Ceramic Club                         | Royal Society Chips           | Royal Society of Players |
| Rumble Kong League       | SLOTHz                      | STRAWBERRY.WTF                             | SVINS                         | Sad Frogs District       |
| Sad Girls Bar            | SamuraiDoge                 | Sappy Seals                                | Satoshibles                   | Savage Droids            |
| Save the Martians        | ScoopDog Squad              | Secret Society of Whales                   | Sewer Rat Social Club         | Shabu Town Shibas        |
| Shaggy Sheep             | Shiba Society               | Sidus NFT Heroes                           | SingularityHeroes             | Sipherian Surge          |
| Skvullpvns Hideout       | Slacker Duck Pond           | Sleeper Hits Collection Volume 1 NFT Cribz | Slimes World                  | Stumdoge Billionaires    |
| Sneaky Vampire Syndicate | Soccer Doge Club            | Space Dinos Club                           | Space Poggers                 | SpacePunksClub           |
| SpaceShibas              | Spookies NFT                | SportsIcon Lion Club                       | Spunks                        | Standametti              |
| Stoned Apez Saturn Club  | Stoner Cats                 | Stranger EggZ                              | StripperVille NFTs            | SupDucks                 |
| Super Yeti               | Superfuzz The Bad Batch     | Superfuzz The Good Guys                    | Sushiverse                    | SympathyForTheDevils     |
| THE PLUTO ALLIANCE       | THE SHRUNKENHEADZ           | The Alien Boy                              | The BirdHouse                 | The CryptoDads           |
| The CryptoSaints         | The Doge Pound              | The Fuckin' Trolls                         | The Goobers                   | The Graveyard Sale       |
| The KILLAZ               | The KittyButts              | The League Of Sacred Devils                | The Lost Glitches             | The MonstroCities        |
| The Moon Boyz            | The NFTBirds                | The Nanoz                                  | The Nemesis Companions        | The Ninja Hideout        |
| The Project URS          | The Sevens (Official)       | The Shark Cove                             | The Soldiers Of The Metaverse | The Street Dawgs         |
| The Unstable Horses Yard | The Vogu Collective         | The Wanderers                              | The Wicked Craniums           | The Wicked Stallions     |
| The WolfGang Pups        | The WonderQuest             | The WynLambo                               | TheHeartProject               | TheTigersGuild           |
| Tie Dye Ninjas           | Tokenmon                    | Tools of Rock                              | Top Dog Beach Club            | TradeSquads              |
| Trollz                   | Ugly Cuties Art Club (UCAC) | United Punks Union                         | Untamed Elephants             | Unusual Whales           |
| VeeFriends               | Vegiemon                    | Vox Collectibles                           | Voxies                        | WE ARE THE OUTKAST       |
| Waifusion                | Wall Street Chads           | Wanna Panda                                | Wannabes Music Club           | Warriors of Aradena      |
| We are Dorkis            | WeMint Washington           | Weird Whales                               | Wicked Ape Bone Club          | Wicked Hound Bone Club   |
| Wild Stag Treehouse      | Winter Bears                | Woodies Generative Characters              | World of Women                | Zunks                    |
| astroGems                | bastard gan penguins        | isotile Genesis Avatars                    | thedudes                      | uwucrew                  |

## D Rarity score distributions

As detailed in the main text, we use Akaike Information Criterium [5] and Maximum Likelihood Estimation to determine the distribution that best describes the rarity score distribution for each collection. We select the distribution among a subset of distributions implemented in the `scipy.stats` python package, requiring the distributions to be heterogeneous, continuous, and with at most 3 parameters (including location and scale). This results in choosing among the following distributions: *uniform*, *pareto*, *cauchy*, *lognormal*, *levy*, *exponential*.

## E Supplementary figures

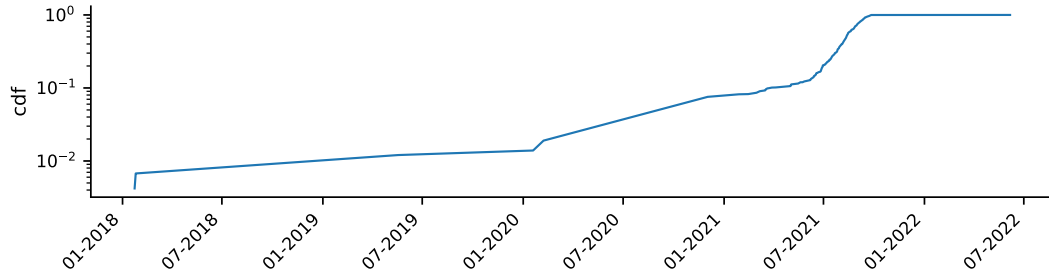

Supplementary Figure 1: **Collectible NFTs minted over time.** Distribution of the collectible NFTs considered in this analysis minted over time.

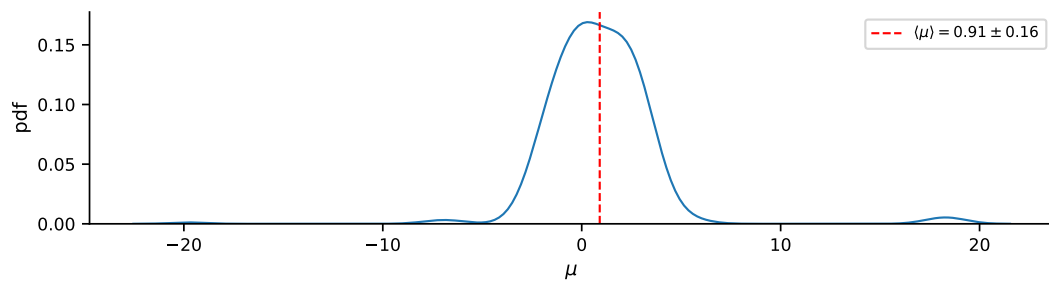

Supplementary Figure 2: **Distribution of the log-normal distribution characteristic parameter  $\mu$ .** Distribution of the log-normal distribution parameter  $\mu$  (blue line), and its average value across collections (red dashed line). The log-normal distribution  $\ln(X) \sim \mathcal{N}(\mu, \sigma^2)$  captures the distribution of rarity for 90% of collections.

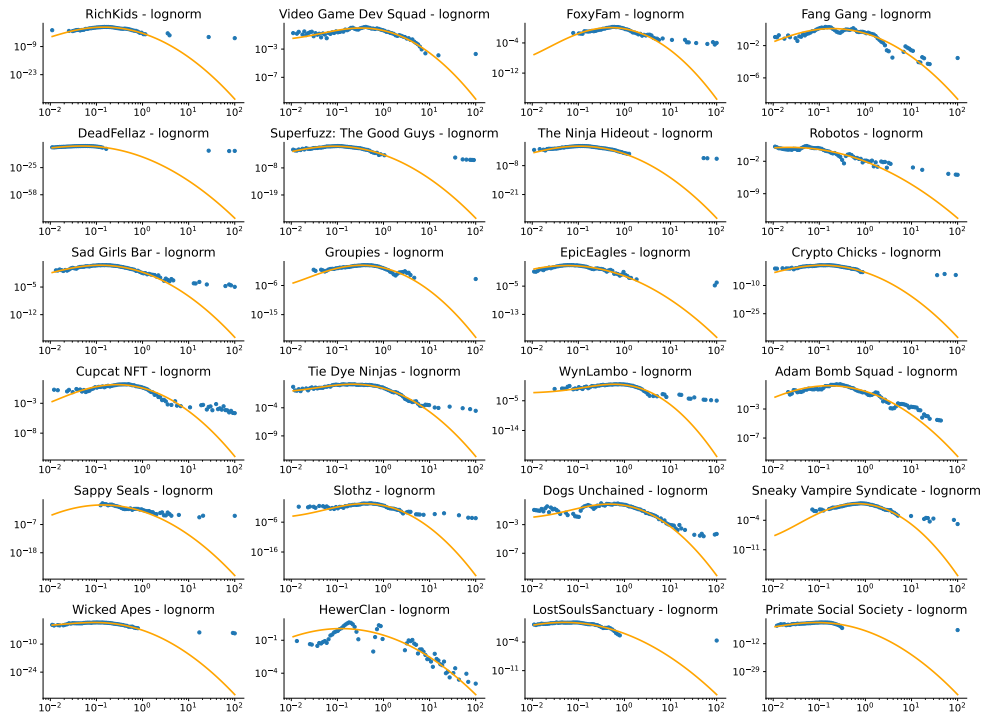

Supplementary Figure 3: **Fitting of the rarity distribution.** Distribution of the rarity score of the NFTs within several collections included in the dataset (blue dots), along with the best distribution fit computed using Maximum Likelihood Estimation and Akaike Information Criterion [5] (orange line).

## E.1 Rarity rank results

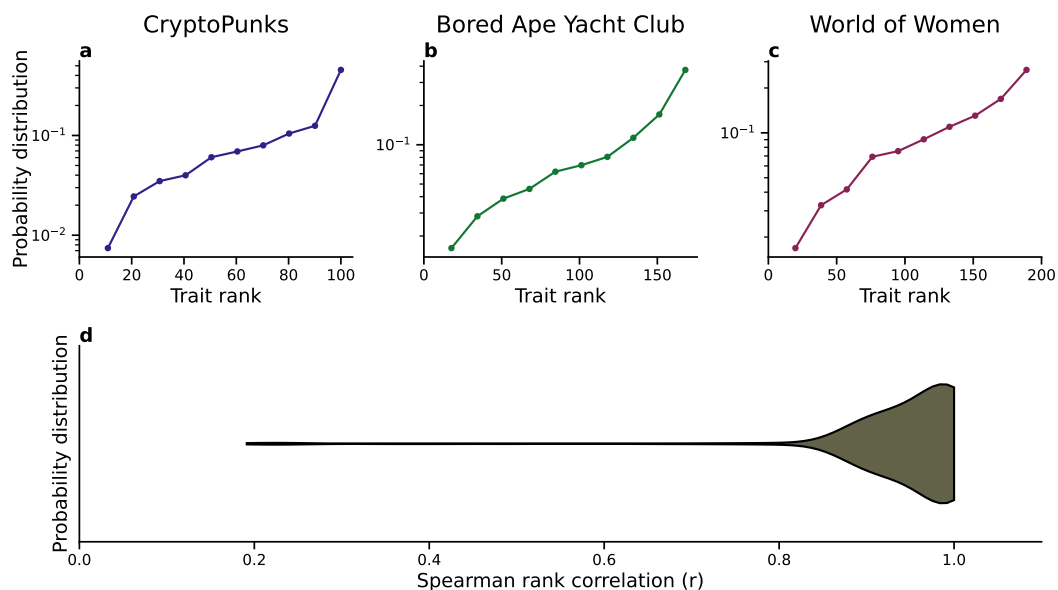

Supplementary Figure 4: **Trait Rarity Rank.** a-c) Distribution of the trait rarity rank of the NFTs within three collections: CryptoPunks (a), Bored Ape Yacht Club (b), and World of Women (c). d) Violin plot of the Spearman Rank correlation computed between the rarity rank and the number of NFTs with that rank.

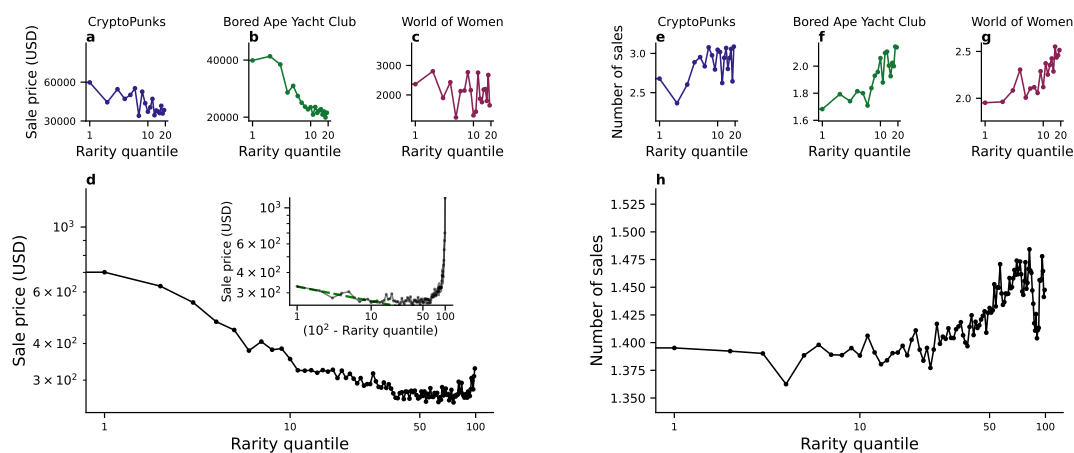

Supplementary Figure 5: **Rare NFTs have a higher financial value and circulate less on the marketplace - Analysis with the rarity rank.** Median sale price in USD (a-c) and average number of sales (e-g) by rarity quantile (with 20 quantiles considered) for three collections: CryptoPunks (a and e), Bored Ape Yacht Club (b and f), and World Women (c and g). d) Median sale price by rarity quantile (with 100 quantiles considered) considering all collections. Inset: median sale price against the quantity  $(100-q)$ , where  $q$  is the rarity quantile, in log-log scale (black line) and the corresponding power law fit (green dashed line). h) Median number of sales by rarity quantile considering all collections. The NFTs are aggregated by quantile depending on their rarity rank, i.e the first quantile represents the rarest NFTs within the collection.

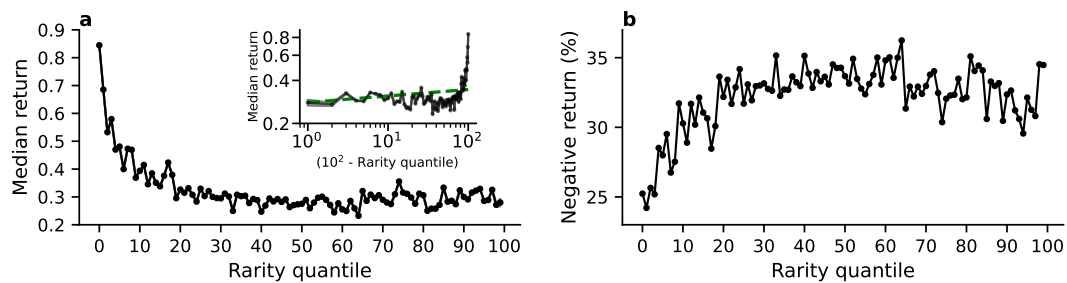

Supplementary Figure 6: **High rarity leads to higher returns, and a lower chance of a negative return - Analysis with the rarity rank.** a) Median return in USD by rarity quantile. Inset: median return against the quantity  $(100-q)$ , where  $q$  is the rarity quantile in log-log scale (black line) and the corresponding power law fit (green dashed line). b) Fraction of sales with negative return in USD by rarity quantile. The NFTs are aggregated by quantile depending on their rarity rank, i.e the first quantile represents the rarest NFTs within the collection.



## E.2 Currency robustness check

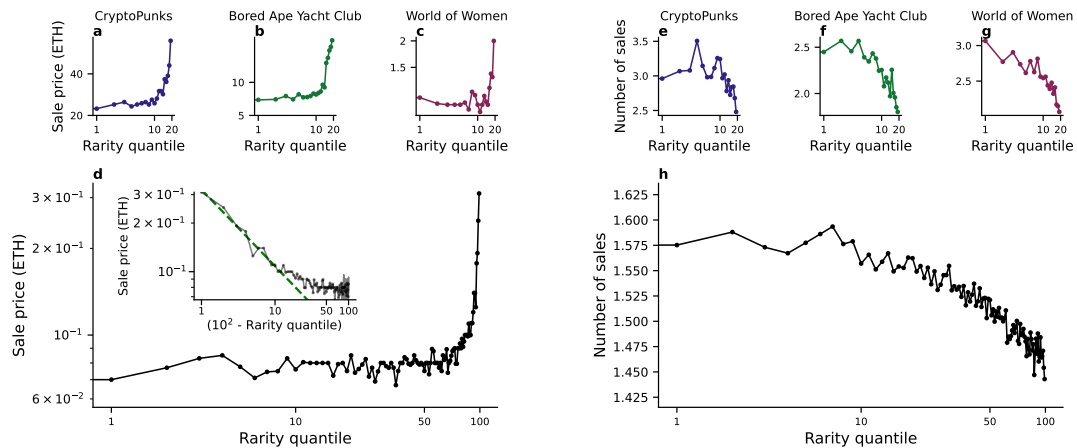

Supplementary Figure 7: **Rare NFTs have a higher financial value and circulate less on the marketplace - Price in ETH.** Median sale price in ETH (a-c) and average number of sales (e-g) by rarity quantile (with 20 quantiles considered) for three collections: CryptoPunks (a and e), Bored Ape Yacht Club (b and f), and World Women (c and g). d) Median sale price by rarity quantile (with 100 quantiles considered) considering all collections. Inset: median sale price against the quantity  $(100-q)$ , where  $q$  is the rarity quantile, in log-log scale (black line) and the corresponding power law fit (green dashed line). h) Median number of sales by rarity quantile considering all collections.

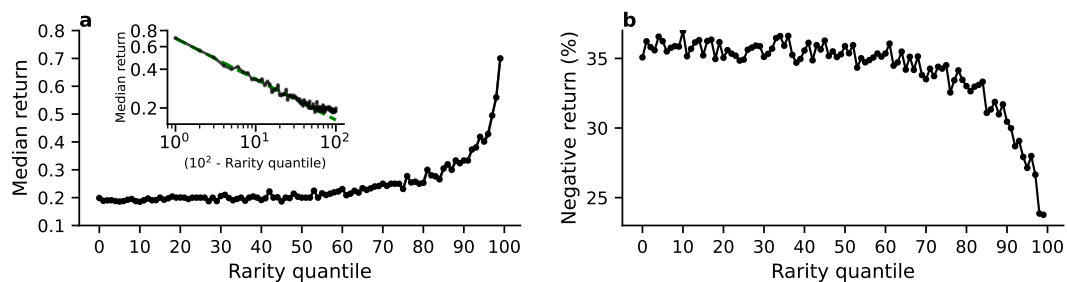

Supplementary Figure 8: **High rarity leads to higher returns, and a lower chance of a negative return - Price in ETH.** a) Median return in ETH by rarity quantile. Inset: median return against the quantity  $(100-q)$ , where  $q$  is the rarity quantile in log-log scale (black line) and the corresponding power law fit (green dashed line). b) Fraction of sales with negative return in ETH by rarity quantile.

### E.3 Time robustness check

To make sure that the findings we highlight in this paper are time-independent, we ran the same analysis by using only the transactions happening during specific time periods, to see whether we observe the same mechanisms within the marketplace. Therefore, we performed the analysis on the two last quarters of 2021, i.e., first on Q3 (July - September 2021) and then on Q4 (October - December 2021).

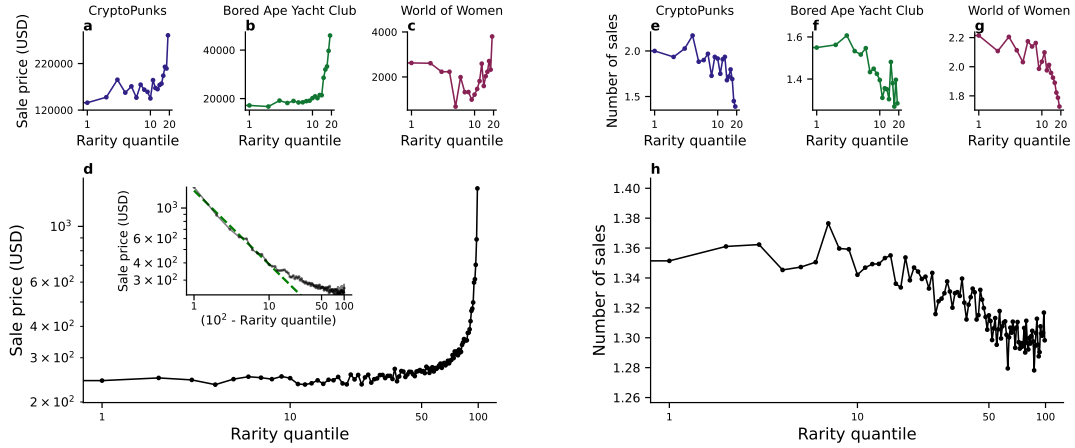

Supplementary Figure 9: **Rare NFTs have a higher financial value and circulate less on the marketplace - Analysis on Q3 2021.** Median sale price in USD (a-c) and average number of sales (e-g) by rarity quantile (with 20 quantiles considered) for three collections: CryptoPunks (a and e), Bored Ape Yacht Club (b and f), and World Women (c and g). d) Median sale price by rarity quantile (with 100 quantiles considered) considering all collections. Inset: median sale price against the quantity  $(100-q)$ , where  $q$  is the rarity quantile, in log-log scale (black line) and the corresponding power law fit (green dashed line). h) Median number of sales by rarity quantile considering all collections. This analysis only takes into consideration the sales happening during Q3 2021.

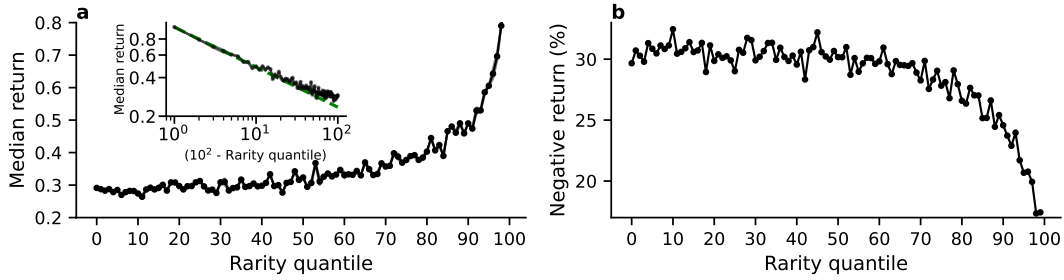

Supplementary Figure 10: **High rarity leads to higher returns, and a lower chance of a negative return - Analysis on Q3 2021.** a) Median return in USD by rarity quantile. Inset: median return against the quantity  $(100-q)$ , where  $q$  is the rarity quantile in log-log scale (black line) and the corresponding power law fit (green dashed line). b) Fraction of sales with negative return in USD by rarity quantile. This analysis only takes into consideration the sales happening during Q3 2021.

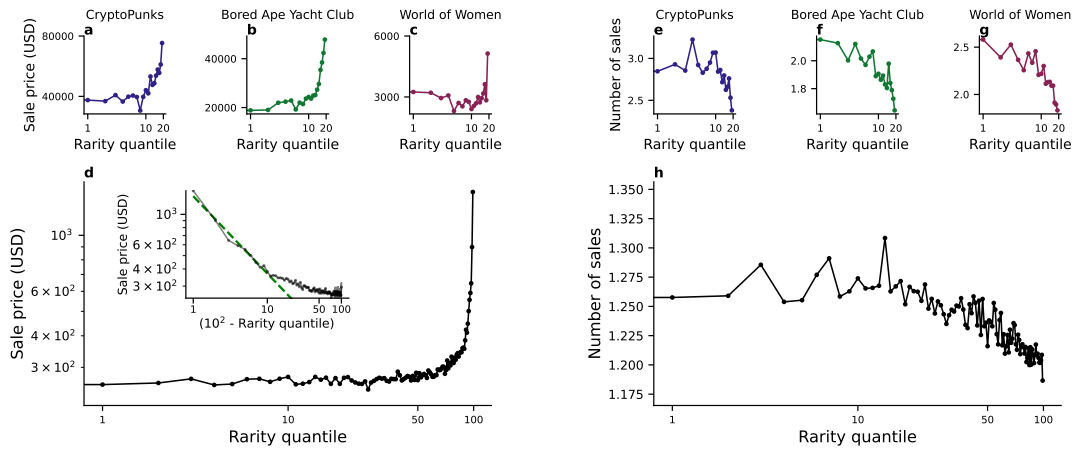

Supplementary Figure 11: **Rare NFTs have a higher financial value and circulate less on the marketplace - Analysis on Q4 2021.** Median sale price in USD (a-c) and average number of sales (e-g) by rarity quantile (with 20 quantiles considered) for three collections: CryptoPunks (a and e), Bored Ape Yacht Club (b and f), and World Women (c and g). d) Median sale price by rarity quantile (with 100 quantiles considered) considering all collections. Inset: median sale price against the quantity  $(100-q)$ , where  $q$  is the rarity quantile, in log-log scale (black line) and the corresponding power law fit (green dashed line). h) Median number of sales by rarity quantile considering all collections. This analysis only takes into consideration the sales happening during Q4 2021.

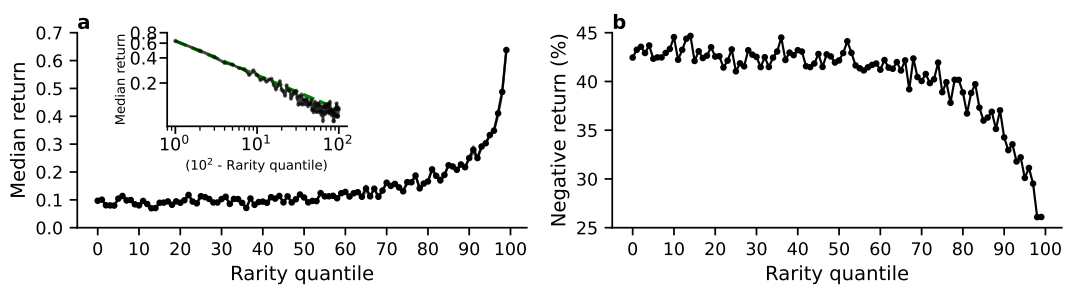

Supplementary Figure 12: **High rarity leads to higher returns, and a lower chance of a negative return - Analysis on Q4 2021.** a) Median return in USD by rarity quantile. Inset: median return against the quantity  $(100-q)$ , where  $q$  is the rarity quantile in log-log scale (black line) and the corresponding power law fit (green dashed line). b) Fraction of sales with negative return in USD by rarity quantile. This analysis only takes into consideration the sales happening during Q4 2021.

## E.4 Tails robustness check

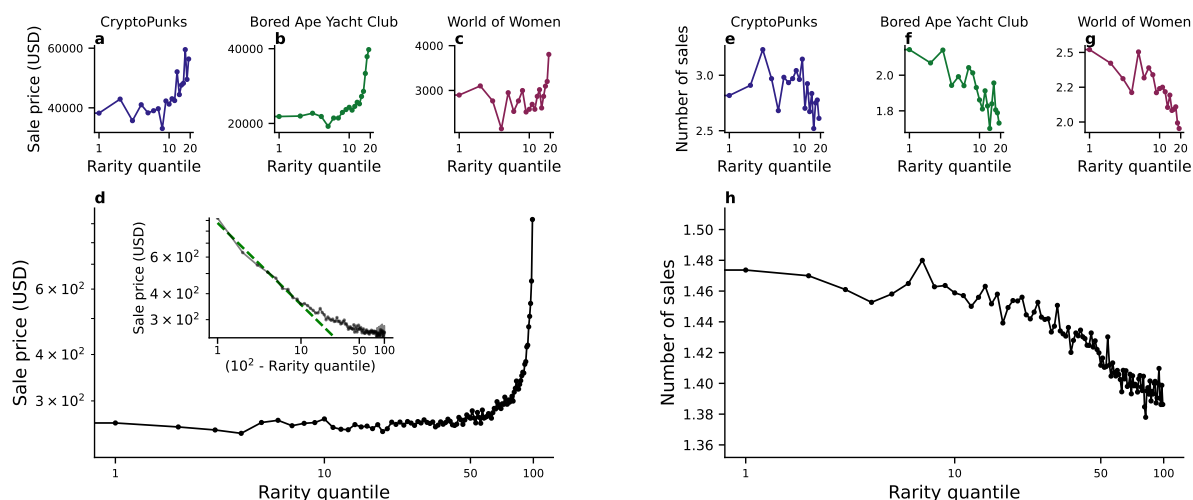

Supplementary Figure 13: **Rare NFTs have a higher financial value and circulate less on the marketplace - Analysis without the rarest and least rare NFTs.** Median sale price in USD (a-c) and average number of sales (e-g) by rarity quantile (with 20 quantiles considered) for three collections: CryptoPunks (a and e), Bored Ape Yacht Club (b and f), and World Women (c and g). d) Median sale price by rarity quantile (with 100 quantiles considered) considering all collections. Inset: median sale price against the quantity  $(100-q)$ , where  $q$  is the rarity quantile, in log-log scale (black line) and the corresponding power law fit (green dashed line). h) Median number of sales by rarity quantile considering all collections. This analysis was performed after discarding the 10% rarest and least rare NFTs from each collection.

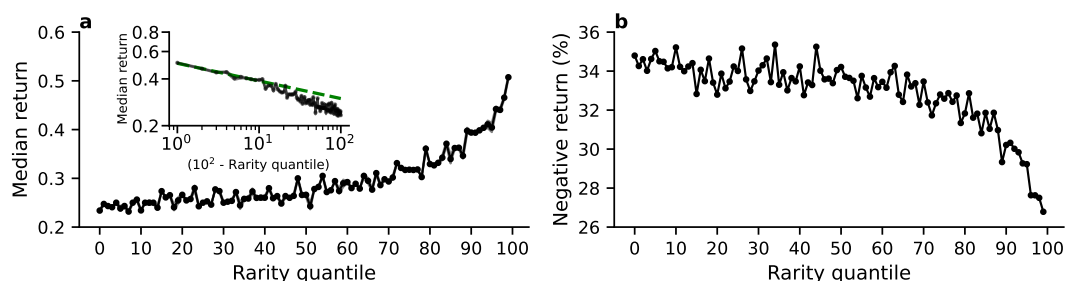

Supplementary Figure 14: **High rarity leads to higher returns, and a lower chance of a negative return - Analysis without the rarest and least rare NFTs.** a) Median return in USD by rarity quantile. Inset: median return against the quantity  $(100-q)$ , where  $q$  is the rarity quantile in log-log scale (black line) and the corresponding power law fit (green dashed line). b) Fraction of sales with negative return in USD by rarity quantile. This analysis was performed after discarding the 10% rarest and least rare NFTs from each collection.

## References

- [1] Katharina Zeuch. An introduction to generative art nfts. <https://medium.com/@datash/an-introduction-to-generative-art-nfts-35e650a0f281> Accessed March 15, 2022.
- [2] The original cryptopunk. <https://andrewschrbr.medium.com/the-original-cryptopunk-a852101a03ed> Accessed April 4, 2022, 2021.
- [3] Inside the punk art machinery - how to generate 10 000 punks (and punkettes), algorithmically - paint by numbers. [https://github.com/cryptopunksnotdead/programming-cryptopunks/blob/master/03\\_generate.md](https://github.com/cryptopunksnotdead/programming-cryptopunks/blob/master/03_generate.md) Accessed April 4, 2022, 2021.
- [4] Creating a 10k nft avatar collection: Expansionpunks step-by-step. <https://medium.com/geekculture/expansionpunks-welcome-to-the-more-inclusive-punkverse-aa77e675bcf5> Accessed April 4, 2022, 2021.
- [5] Eric-Jan Wagenmakers and Simon Farrell. Aic model selection using akaike weights. *Psychonomic bulletin & review*, 11(1):192–196, 2004.
